# Supplementary material for: New hypotheses of cell type diversity and novelty from orthology-driven comparative single cell and nuclei transcriptomics in echinoderms
Source: eLife. 2023 Jul 20;12:e80090. doi: 10.7554/eLife.80090 (PMC10396339; doi:10.7554/eLife.80090)
Supplement: Supplementary file 1. [file elife-80090-supp1.xlsx]

## Sheet: Sheet1
Used Name and Symbol (echinobase)		NCBI	Ensembl ID	NCBI	Ensembl ID
Gene Symbol	Gene Name	Pm gene ID	Sp gene ID	Pm gene name	Sp gene name	Notes
aanat	serotonin N-acetyltransferase-like	LOC119728949	N/A	serotonin N-acetyltransferase-like isoform X2	#N/A
adrbk2	beta-adrenergic receptor kinase 2	LOC119727004	LOC100888242	beta-adrenergic receptor kinase 2-like isoform X2	beta-adrenergic receptor kinase 2
afi1l_1	allograft inflammatory factor 1-like	N/A	LOC763226	#N/A	allograft inflammatory factor 1-like
agtrap	type-1 angiotensin II receptor-associated protein-like	LOC119744764	LOC105446089	type-1 angiotensin II receptor-associated protein-like	type-1 angiotensin II receptor-associated protein-like isoform X2
ahnak	neuroblast differentiation-associated protein AHNAK	N/A	LOC580388	#N/A	neuroblast differentiation-associated protein AHNAK
aif1l_2	allograft inflammatory factor 1-like	N/A	LOC115929190	#N/A	allograft inflammatory factor 1-like
alx1	aristaless-like homeobox	LOC119727319	Alx1	pituitary homeobox 1-like isoform X1	aristaless-like homeobox protein isoform X2
ankat1	ankyrin containing gene specific for apical tuft 1	LOC119738417	AnkAT-1	uncharacterized protein LOC119738417	ankyrin-containing gene specific for apical tuft-1
arid3a	AT-rich interactive domain-containing protein 3A	LOC119745283	dri	AT-rich interactive domain-containing protein 3C-like	LOW QUALITY PROTEIN: protein dead ringer homolog
arsal	arylsulfatase A-like	N/A	ARS	#N/A	arylsulfatase precursor
astar	allatostatin-A receptor	N/A	LOC100889602	#N/A	allatostatin-A receptor
astar	allatostatin-A receptor	N/A	LOC100889602	#N/A	allatostatin-A receptor
bxl6	probable beta-D-xylosidase 6	LOC119741109	N/A	probable beta-D-xylosidase 6	#N/A
c3	complement C3	N/A	LOC575436	#N/A	complement C3 isoform X1
cacna1al	voltage-dependent calcium channel type A subunit alpha-1-like	LOC119740397	N/A	voltage-dependent calcium channel type A subunit alpha-1-like isoform X1	#N/A
cacna1dl	voltage-dependent L-type calcium channel subunit alpha-1D-like	LOC119737342	LOC115917871	voltage-dependent L-type calcium channel subunit alpha-1D-like isoform X5	voltage-dependent L-type calcium channel subunit alpha-1D-like isoform X4
cacna2d1	voltage-dependent calcium channel subunit alpha-2/delta-1	LOC119726304	LOC105441547	voltage-dependent calcium channel subunit alpha-2/delta-2-like isoform X8	voltage-dependent calcium channel subunit alpha-2/delta-1 isoform X2
cacna3d	voltage-dependent calcium channel subunit alpha-2/delta-3	LOC119732145	LOC100890679	voltage-dependent calcium channel subunit alpha-2/delta-3-like isoform X4	voltage-dependent calcium channel subunit alpha-2/delta-3 isoform X2
cacnb1	voltage-dependent L-type calcium channel subunit beta-1	LOC119741735	LOC585535	voltage-dependent L-type calcium channel subunit beta-1-like isoform X3	voltage-dependent L-type calcium channel subunit beta-1
calu	calumenin	LOC119737679	LOC752471	calumenin isoform X2	calumenin-B-like isoform X2
cclta1	non L-type Cav channel	LOC119734356	LOC574743	voltage-dependent calcium channel type A subunit alpha-1-like isoform X8	voltage-dependent calcium channel type A subunit alpha-1 isoform X12
ccna2	cyclin A2	LOC119727750	CycA	G2/mitotic-specific cyclin-A-like	cyclin A
ccnb2	cyclin B2	LOC119742066	LOC576779	G2/mitotic-specific cyclin-B-like	cyclin B
cdt1	chromatin licensing and DNA replication factor 1	LOC119737580	LOC575779	DNA replication factor Cdt1-like	DNA replication factor Cdt1
cfap410	cilia and flagella associated protein 410	LOC119745442	LOC576797	cilia- and flagella-associated protein 410-like isoform X2	cilia- and flagella-associated protein 410 isoform X1
chrd	chordin	N/A	CHRD	#N/A	chordin precursor
chrdl	chordin-like	LOC119731780	N/A	chordin-like	#N/A
chrna10	neuronal acetylcholine receptor subunit alpha-10	LOC119741649	LOC577316	neuronal acetylcholine receptor subunit alpha-10-like	neuronal acetylcholine receptor subunit alpha-10
chrna9l	neuronal acetylcholine receptor subunit alpha-9-like	LOC119739839	LOC575288	neuronal acetylcholine receptor subunit alpha-10-like isoform X2	neuronal acetylcholine receptor subunit alpha-9-like
clec141l	C-type lectin domain-containing protein 141-like	N/A	LOC115920207	#N/A	C-type lectin domain-containing protein 141-like
cmip	c-Maf inducing protein	LOC119737047	LOC584896	C-Maf-inducing protein	C-Maf-inducing protein-like
colp3alpha	collagen type IV alpha 1 chain	LOC119724229	COLP3alpha	collagen alpha-5(IV) chain-like	#N/A
dach1	dachshund homolog 1	LOC119728766	LOC115918252	dachshund homolog 1-like	dachshund homolog 1-like
dd186	DD186 protein, upregulated upon bacterial challenge	N/A	DD186	#N/A	DD186 protein, upregulated upon bacterial challenge
ddo	D-aspartate oxidase	N/A	LOC590206	#N/A	D-aspartate oxidase
dlxl	distal-less homeobox-like	LOC119745598	Dlx	homeobox protein Dlx4a-like	distal-less homeobox
dnah2	dynein heavy chain 2, axonemal-like	LOC119728258	N/A	dynein heavy chain 2, axonemal-like isoform X1	#N/A
dnah2l	dynein heavy chain 2, axonemal-like	LOC119728259	N/A	dynein heavy chain 2, axonemal-like	#N/A
drd1	D(1) dopamine receptor	LOC119737386	LOC100887891	alpha-2A adrenergic receptor-like isoform X1	D(1) dopamine receptor
drp2	dystrophin related protein 2	LOC119730218	LOC115928086	dystrophin-like isoform X2	dystrophin-like isoform X1
duox1	dual oxidase maturation factor 1	LOC119745939	LOC576350	dual oxidase maturation factor 1-like isoform X2	dual oxidase maturation factor 1 isoform X1
dvr1	protein DVR-1 homolog	N/A	LOC764641	#N/A	protein DVR-1 homolog isoform X1
ebr1	egg bindin receptor 1	N/A	ebr1	#N/A	egg bindin receptor 1 precursor
ece2l	endothelin-converting enzyme 2-like	LOC119729539	N /A	endothelin-converting enzyme 2-like	#N/A
egf1	fibropellin I	N/A	egf1	#N/A	fibropellin-1 precursor
egf2	uncharacterized LOC105440225 (synonyms: vascular endothelial growth factor, vascular endothelial growth factor-like 2)	LOC119727516	EGF2	uncharacterized protein LOC119727516 isoform X1	fibropellin-2 precursor
egfIII	fibropellin c	N/A	EGFIII	#N/A	fibropellin-3 precursor
ehfl	ets homologous factor	N/A	LOC582205	#N/A	uncharacterized protein LOC582205 isoform X1
eif4g3	eukaryotic translation initiation factor 4 gamma 3	LOC119743128	LOC588274	eukaryotic translation initiation factor 4 gamma 1-like isoform X5	eukaryotic translation initiation factor 4 gamma 3 isoform X1
elavl1-b	ELAV-like protein 1-B	LOC119737432	N/A	ELAV-like protein 1-B isoform X2	#N/A
elk1	ETS transcription factor ELK 1	LOC119737496	Elk	ETS domain-containing protein Elk-3-like isoform X1	transcription factor Elk
emx1l	empty spiracles homeobox 1-like	LOC119720777	LOC577702	homeobox protein EMX1-like	homeobox protein EMX1
endo16	calcium-binding protein	N/A	Endo16	#N/A	protein ENDO16 precursor
epha2	EPH receptor A2	LOC119732269	LOC763632	ephrin type-B receptor 2-like	ephrin type-B receptor 2
erg	transcriptional regulator ERG	N/A	LOC115917879	#N/A	transcriptional regulator Erg-like isoform X6
err	estrogen related receptor	N/A	LOC579264	#N/A	estrogen-related receptor gamma
err	estrogen related receptor	N/A	LOC579264	#N/A	estrogen-related receptor gamma
ethr-a	ecdysis triggering hormone receptor subtype-A	LOC119746216	LOC581903	QRFP-like peptide receptor	orexin receptor type 2
ets1	ETS proto-oncogene 1, transcription factor	LOC119735414	ets1	protein C-ets-1-like isoform X1	ets homolog isoform X1
etv1	ETS variant transcription factor 1	LOC119729620	LOC580556	ETS translocation variant 1-like	ETS translocation variant 1 isoform X1
etv6	ets variant transcription factor 6	LOC119738174	LOC591714	uncharacterized protein LOC119738174	ets DNA-binding protein pokkuri
evxl	even-skipped-like protein-like	LOC119745851	eve	homeobox even-skipped homolog protein 2-like	even-skipped-like protein isoform X1
eya1	EYA transcriptional coactivator and phosphatase 1	LOC119728880	LOC584048	eyes absent homolog 1-like isoform X2	eyes absent homolog 1 isoform X1
fdx1	ferredoxin 1	N/A	LOC578536	#N/A	adrenodoxin
fgfr3	fibroblast growth factor receptor 3	N/A	LOC373310	#N/A	#N/A
fgfrl1	fibroblast growth factor receptor like 1	LOC119720107	FGFRL1	fibroblast growth factor receptor-like 1	Fibroblast growth factor receptor-like 1 precursor
fibrillin-3	fibrillin-3	LOC119736511	LOC591161	fibrillin-1-like	#N/A
fibropellin-1	fibropellin-1	LOC119741108	LOC576643	uncharacterized protein LOC119741108 isoform X2	uncharacterized protein LOC576643 isoform X2
fibropellin-1	fibropellin-1	LOC576643	LOC576643	uncharacterized protein LOC576643 isoform X2	uncharacterized protein LOC576643 isoform X2
fibulin-1	fibulin-1	LOC119731995	LOC582612	fibulin-1-like isoform X2	fibulin-1 isoform X2
flt1	vascular endothelial growth factor receptor 1	N/A	LOC579837	#N/A	vascular endothelial growth factor receptor 1
foxa1	forkhead box A1	LOC119740965	FoxA	forkhead box protein A2-like	forkhead transcription factor A
foxj1	forkhead box J1	LOC119734799	FoxJ1	forkhead box protein J1-B-like	forkhead transcription factor J1
foxn3	forkhead box N3	LOC119720745	LOC590815	forkhead box protein N3-like	forkhead box protein N3
foxo1	forkhead box O1	LOC119744882	LOC585334	forkhead box protein O3-like	forkhead box protein O1
foxp4	forkhead box p4	LOC119737339	LOC577677	forkhead box protein P1-like isoform X6	forkhead box protein P1 isoform X1
fum1	highly reducing polyketide synthase FUM1-like	LOC119744703	N/A	highly reducing polyketide synthase FUM1-like	#N/A
gabab2	gamma-aminobutyric acid type B receptor subunit 2	LOC119728806	LOC763655	gamma-aminobutyric acid type B receptor subunit 2-like	gamma-aminobutyric acid type B receptor subunit 2
gata3	GATA binding protein 3	LOC119726590	GATAc	GATA-binding factor 2-like	GATA transcription factor isoform X1
gata6	GATA binding protein 6	LOC119724911	GATAe	GATA-binding factor 3-like isoform X1	GATA transcription factor e isoform X2
gcml	glial cells missing transcription factor-like	LOC119729068	gcm	uncharacterized protein LOC119729068	glial cells missing-like protein
gfi1	growth factor independent 1 transcriptional repressor	LOC119734323	LOC589099	zinc finger protein Gfi-1b-like	zinc finger protein 764-like
gmfb	glia maturation factor beta	N/A	LOC115918196	#N/A	glia maturation factor beta-like
gmnnl	geminin-like	LOC119728448	N/A	geminin-like	#N/A
got1	glutamic-oxaloacetic transaminase 1	LOC119739772	LOC589279	aspartate aminotransferase, cytoplasmic-like isoform X2	aspartate aminotransferase, cytoplasmic
gscl	goosecoid homeobox-like	LOC119742666	Gsc	homeobox protein goosecoid-like	goosecoid transcription factor
hbn	homeobrain	N/A	LOC575572	#N/A	retinal homeobox protein Rx1
hbox7	homeodomain protein	LOC119745549	Hbox7	homeobox protein Hox-D8-like	homeodomain protein
hes4	transcription factor HES-4	LOC119743140	LOC592057	transcription factor HES-4-like	transcription factor HES-4
heyl	hairy/enhancer-of-split related with YRPW motif-like protein	LOC119730474	N/A	hairy/enhancer-of-split related with YRPW motif-like protein	#N/A
hh	hedgehog family	LOC119729696	hh	indian hedgehog protein-like	hedgehog precursor
hhex	hematopoietically-expressed homeobox protein HHEX homolog	N/A	LOC575826	#N/A	hematopoietically-expressed homeobox protein HHEX homolog
hlx	H2.0-like homeobox protein	N/A	LOC582802	#N/A	H2.0-like homeobox protein isoform X1
hmxl1	H6 family homeobox-like 1	N/A	LOC115924126	#N/A	homeobox protein Hmx
hmxl2	H6 family homeobox-like 2	N/A	LOC115917868	#N/A	homeobox protein Hmx-like isoform X1
hnf1a	HNF1 homeobox A	LOC119730701	LOC764728	hepatocyte nuclear factor 1-alpha-like	uncharacterized protein LOC764728
hoxd9a	homeobox protein Hox-D9a	LOC119741991	LOC756604	homeobox protein Hox-D9-like	homeobox protein Hox-D9a
irx4	iroquois homeobox 4	N/A	IrxA	#N/A	iroquois homeobox A
jmjd1c	probable JmjC domain-containing histone demethylation protein 2C	LOC119740285	LOC589728	uncharacterized protein LOC119740285	LOW QUALITY PROTEIN: probable JmjC domain-containing histone demethylation protein 2C
kcnh7	potassium voltage-gated channel subfamily H member 7	LOC119744535	LOC757031	potassium voltage-gated channel subfamily H member 6-like isoform X1	potassium voltage-gated channel subfamily H member 7 isoform X2
klf6	Kruppel like factor 6	LOC119721960	Klf7	Krueppel-like factor 6	Kruppel-like factor 7
lhx1	LOC199731780	LOC119730222	Lim1	LIM/homeobox protein Lhx5-like	Lim homeodomain transcription factor 1
lhx9	LIM homeobox 9	LOC119734581	LOC576656	LIM/homeobox protein Lhx2-like	LIM/homeobox protein Lhx9
mapk1	mitogen-activated protein kinase 1	LOC119730216	LOC373525	mitogen-activated protein kinase 1-like	MAP kinase
mapkbp1	mitogen-activated protein kinase-binding protein 1	LOC119743414	LOC576108	WD repeat-containing protein 62-like isoform X2	mitogen-activated protein kinase-binding protein 1
mbl	myoglobin-like	LOC119742149	LOC115929610	globin CTT-VIIB-8-like	myoglobin-like
mec4	degenerin mec-4	LOC119745761	LOC100894064	amiloride-sensitive sodium channel subunit beta-like isoform X1	degenerin mec-4
mlckl	myosin light chain kinase, smooth muscle-like	LOC119721200	N/A	myosin light chain kinase, smooth muscle-like isoform X1	#N/A
msp130	mesenchyme-specific cell surface glycoprotein	N/A	msp130	#N/A	mesenchyme-specific cell surface glycoprotein isoform X1
msx1	msh homeobox 1	LOC119739984	Msx	muscle segmentation homeobox-like	homeodomain protein isoform X1
msxl	msh homeobox-like	LOC119741520	LOC100893580	homeobox protein MSX-2-like	retinal homeobox protein Rax
mta	metallothionein a	N/A	MTa	#N/A	metallothionein-A
muc16	mucin-16-like	LOC119741838	N/A	mucin-16-like isoform X2	#N/A
myosin V	myosin V	LOC119729753	LOC373234	LOW QUALITY PROTEIN: unconventional myosin-Va-like	myosin V
nanos2l	nanos C2HC-type zinc finger 2-like	N/A	Nanos2	#N/A	nanos 2
neo1l	neogenin-like	LOC119745933	N/A	neogenin-like isoform X1	#N/A
neurabin-1	neurabin-1	N/A	LOC577610	#N/A	neurabin-1 isoform X3
nk1-2l	NK1 transcription factor-related protein 2-like	LOC119739852	N/A	NK1 transcription factor-related protein 2-like	#N/A
nkx2-1	nk2 homeobox 1	LOC119741084	NK2.1	homeobox protein Nkx-2.1-like	homeodomain protein NK2.1 isoform X1
nkx2-2	nk2 homeobox 2	LOC119741170	NK2.2	homeobox protein Nkx-2.2a-like	NK2 homeodomain protein
nlk	nemo like kinase	LOC119743396	LOC574783	serine/threonine-protein kinase NLK-like	serine/threonine-protein kinase NLK isoform X2
notch1	notch recepter 1	N/A	LOC592853	#N/A	neurogenic locus notch homolog protein 1
nr6a1b	nuclear receptor subfamily 6 group A member 1B	LOC119734244		LOW QUALITY PROTEIN: hormone receptor 4-like	#N/A
onecut2	one cut homeobox 2	N/A	LOC115917884	#N/A	one cut domain family member 2-like isoform X1
opn5	opsin 5	LOC119722365	LOC763367	opsin-5-like	opsin-5
opn5	opsin 5	LOC119722365	LOC763367	opsin-5-like	opsin-5
orctl	organic cation transporter protein-like	LOC119722087	N/A	organic cation transporter protein-like isoform X1	#N/A
otx2	orthodenticle homeobox 2	LOC119721166	otx	homeobox protein OTX-like isoform X1	homeobox protein OTX isoform beta
pax5l	paired box protein Pax-5-like	LOC119732204	N/A	paired box protein Pax-5-like isoform X2	#N/A
pax6	paired box 6	LOC119738408	LOC100892714	paired box protein Pax-6-like isoform X2	paired box protein Pax-6 isoform X3
pclafl	PCNA-associated factor-like	LOC119745257	N/A	PCNA-associated factor-like	#N/A
pendrin	pendrin	LOC119737354	LOC588264	solute carrier family 26 member 6-like isoform X1	pendrin isoform X3
pgrmc1l	membrane-associated progesterone receptor component 1-like	N/A	LOC115918492	#N/A	membrane-associated progesterone receptor component 1-like
piwil2	piwi like RNA-mediated gene silencing 3	N/A	LOC373434	#N/A	seawi isoform X1
pkd2	polycystin 2, transient receptor potential cation channel	LOC119731326	pkd2	polycystic kidney disease 2-like 1 protein isoform X7	polycystic kidney disease protein 2 isoform X4
pks1	probable polyketide synthase 1	N/A	LOC588806	#N/A	probable polyketide synthase 1
pks2	polyketide synthase 2	N/A	LOC592147	#N/A	polyketide synthase 2
Pm-chrna10l	neuronal acetylcholine receptor subunit alpha-10-like	LOC119730478	N/A	neuronal acetylcholine receptor subunit alpha-10-like isoform X1	#N/A
Pm-erg	transcriptional regulator ERG homolog	LOC119735630	N/A	transcriptional regulator ERG homolog isoform X1	#N/A
Pm-onecut2	one cut domain family member 2-like	LOC119725341	N/A	one cut domain family member 2-like	#N/A
Pm-syt1l	synaptotagmin-1-like	LOC119740612	N/A	synaptotagmin-1-like	#N/A
pm27	27 kDa primary mesenchyme-specific spicule protein	N/A	PM27	#N/A	27 kDa primary mesenchyme-specific spicule protein precursor
prdm1	PR/SET domain 1	LOC119745514	blimp1/krox	PR domain zinc finger protein 1-like isoform X2	Blimp1/Krox1b isoform 1
prox1	prospero homeobox 1	N/A	prox1	#N/A	prospero homeobox protein 1 isoform X2
rab27a	RAB27A, member RAS oncogene family	LOC119745823	rab27a	ras-related protein Rab-27A-like	ras-related protein Rab-27A-like
rab3	rab3 GTPase	LOC119722414	rab3	ras-related protein Rab-3-like isoform X1	rab3 GTPase isoform X1
radil	Rap associating with DIL domain	LOC119734674	LOC100891417	ras-associating and dilute domain-containing protein-like isoform X1	ras-associating and dilute domain-containing protein isoform X1
rap2c	ras-related protein Rap-2c	LOC119724137	LOC753090	ras-related protein Rap-2a-like	ras-related protein Rap-2c
rbfox3	RNA binding protein fox-1 homolog 3	LOC119737003	LOC100890824	RNA binding protein fox-1 homolog 3 isoform X10	RNA binding protein fox-1 homolog 3-like isoform X3
rhoa	ras homolog family member A	N/A	LOC585398	#N/A	ras homolog gene family, member C-like
rsph1	radial spoke head component 1	LOC119735553	LOC585190	#N/A	radial spoke head 1 homolog isoform X1
runx2	RUNX family transcription factor 2	N/A	SpRunt-1	#N/A	SpRunt-1 protein
sarcospan	sarcospan	LOC119726695	LOC100888814	sarcospan-like	sarcospan
saxo1	stabilizer of axonemal microtubules 1-like	LOC119722033	N/A	stabilizer of axonemal microtubules 1-like	#N/A
saxo1l	stabilizer of axonemal microtubules 1-like	LOC119722033	N/A	stabilizer of axonemal microtubules 1-like	#N/A
saxo2	stabilizer of axonemal microtubules 2	LOC119740757	LOC100890512	LOW QUALITY PROTEIN: stabilizer of axonemal microtubules 2-like	stabilizer of axonemal microtubules 2
sctrl	secretin receptor-like	LOC119745952	N/A	secretin receptor-like isoform X3	#N/A
scube1	signal peptide, CUB and EGF-like domain-containing protein 1	LOC119726279	LOC577317	signal peptide, CUB and EGF-like domain-containing protein 1 isoform X1	signal peptide, CUB and EGF-like domain-containing protein 1 isoform X6
sdc	syndecan	N/A	Sdc	#N/A	syndecan precursor
shal	potassium voltage-gated channel protein Shal	LOC119738693	LOC582202	potassium voltage-gated channel protein Shal-like isoform X2	potassium voltage-gated channel protein Shal
six6l	homeobox protein SIX6-like	LOC119721027	N/A	homeobox protein SIX6-like	#N/A
slc4a11	solute carrier family 4 member 11	LOC119722410	LOC579418	sodium bicarbonate transporter-like protein 11	sodium bicarbonate transporter-like protein 11 isoform X3
sm37	spicule matrix protein SM37	N/A	SM37	#N/A	spicule matrix protein SM37 precursor
sm50	spicule matrix protein SM50	N/A	SM50	#N/A	50 kDa spicule matrix protein isoform X1
smad6l	mothers against decapentaplegic homolog 6-like	LOC119745554	N/A	mothers against decapentaplegic homolog 6-like	#N/A
smtnl	smoothelin-like	LOC119730695	N/A	smoothelin-like isoform X1	#N/A
sox14	SRY-box transcription factor 14	LOC119723841	SoxB2	transcription factor Sox-14-like	transcription factor SoxB2
sox2	SRY-box transcription factor 2	LOC119723839	SoxB1	transcription factor Sox-3-like	transcription factor SoxB1
sox4	SRY-box transcription factor 4	LOC119729307	LOC593520	transcription factor SOX-4-like	transcription factor SOX-4
Sp-six6	SIX homeobox 6	N/A	LOC576281	#N/A	homeobox protein SIX6
Sp-syt1l	synaptotagmin-1-like	N/A	LOC115917880	#N/A	synaptotagmin-1-like isoform X2
spdef	SAM pointed domain containing ETS transcription factor	LOC119719393	Ets4	SAM pointed domain-containing Ets transcription factor-like	Ets4 transcription factor
spec1	spec 1a protein	N/A	SPEC1	#N/A	calcium-binding protein SPEC 1A
spec2c_1	spec2c protein	N/A	spec2c	#N/A	calcium-binding protein SPEC 2C
spec2c_2	calcium-binding protein SPEC 2C	N/A	LOC100888959	#N/A	calcium-binding protein SPEC 2A
spp19l	biomineralization proteins SpP19L long form	N/A	SpP19L	#N/A	biomineralization proteins SpP19L long form isoform X1
spred2	sprouty related EVH1 domain containing 2	LOC119740376	LOC580515	sprouty-related, EVH1 domain-containing protein 2-like	sprouty-related, EVH1 domain-containing protein 3
Srcr	scavenger receptor cysteine-rich domain superfamily protein	LOC119729296	LOC580497	scavenger receptor cysteine-rich domain superfamily protein	scavenger receptor cysteine-rich domain superfamily protein isoform X2
srcr2	scavenger receptor cysteine-rich protein variant 2	N/A	LOC373213	#N/A	scavenger receptor cysteine-rich protein variant 2 precursor
srfp5	secreted frizzled related protein 5	N/A	LOC575604	#N/A	secreted frizzled-related protein 5 isoform X2
srfp5l	secreted frizzled-related protein 5-like	LOC119725501	N/A	secreted frizzled-related protein 5-like isoform X2	#N/A
srrm1	serine/arginine repetitive matrix protein 1	LOC119720841	LOC100893485	disks large-associated protein 1-like	serine/arginine repetitive matrix protein 1
stt14	synaptotagmin-14	LOC119742890	LOC577619	synaptotagmin-16-like isoform X4	synaptotagmin-14 isoform X2
sult	sulfotransferase	N/A	LOC592500	#N/A	sulfotransferase isoform X1
syt4l	synaptotagmin-like protein 4	LOC119730824	N/A	synaptotagmin-like protein 4 isoform X4	#N/A
syt7	synaptotagmin-7	LOC119721191	LOC594711	LOW QUALITY PROTEIN: synaptotagmin-7-like	synaptotagmin-7
tbr1	T-box brain transcription factor 1	N/A	LOC586389	#N/A	optomotor-blind protein
tbx2	T-box transcription factor 2	LOC119727010	Tbx2/3	T-box transcription factor TBX2-like isoform X1	T-box 2/3 protein isoform X1
tbxt	T-box transcription factor T	LOC119745670	LOC576774	T-box transcription factor T homolog	T-box transcription factor T homolog isoform X2
tek	TEK receptor tyrosine kinase	LOC119722419	TIE1/2	tyrosine-protein kinase receptor Tie-1-like	tie-like receptor tyrosine kinase
tekt2	tektin 2	LOC119729038	LOC373482	tektin-B1-like	tektin-B1 isoform X1
tekt3	tektin 3	LOC119737410	LOC586326	tektin-3-like	LOW QUALITY PROTEIN: tektin-3
tekt4	tektin 4	LOC119734508	LOC577210	tektin-4-like	tektin A1
tenm3l	teneurin-3-like	LOC119728739	N/A	teneurin-3-like isoform X1	#N/A
tfap2a	transcription factor AP-2 alpha	LOC119729012	LOC577118	transcription factor AP-2-epsilon-like isoform X3	transcription factor AP-2-alpha
tfap4	transcription factor AP-4	LOC119727140	LOC578637	transcription factor AP-4-like	transcription factor AP-4
tgif2l	TGFB induced factor homeobox 2-like	LOC119729187	LOC575445	iroquois-class homeodomain protein IRX-1-like	homeobox protein TGIF2 isoform X1
thada	thyroid adenoma-associated protein homolog	LOC119742025	LOC100889845	thyroid adenoma-associated protein homolog isoform X3	thyroid adenoma-associated protein homolog
thrb	thyroid hormone receptor beta	LOC119740962	LOC584535	thyroid hormone receptor alpha-like	thyroid hormone receptor beta isoform X2
tnsk2l	poly [ADP-ribose] polymerase tankyrase-like	LOC119740989	N/A	poly [ADP-ribose] polymerase tankyrase-like isoform X3	#N/A
tph1l	tryptophan 5-hydroxylase 1-like	LOC115922565	LOC119740445	LOW QUALITY PROTEIN: tryptophan 5-hydroxylase 1-like	tryptophan 5-hydroxylase 1-like
tulp4	TUB like protein 4	LOC119744796	LOC591879	tubby-related protein 4-like	tubby-related protein 4 isoform X2
ugt2c1l	UDP-glucuronosyltransferase 2C1-like	LOC119731706	N/A	UDP-glucuronosyltransferase 2C1-like isoform X2	#N/A
vdrl	vitamin D3 receptor-like	LOC119740484	N/A	vitamin D3 receptor-like	#N/A
vegf3l	vascular endothelial growth factor 3-like	N/A	LOC100889860	#N/A	uncharacterized protein LOC100889860
vegfr1l	vascular endothelial growth factor receptor 1-like	LOC119719573	N/A	vascular endothelial growth factor receptor 1-like	#N/A
wnt1	Wnt family member 1	LOC119721263	wnt1	protein Wnt-1-like	protein Wnt-1 precursor
wnt16	Wnt family member 16	LOC119726703	LOC591980	protein Wnt-16-like	protein Wnt-16
wnt3	Wnt family memer 3	LOC119741509	LOC585683	proto-oncogene Wnt-3-like	proto-oncogene Wnt-3
wnt5a	wingless-related MMTV integration site 5A	N/A	LOC578814	#N/A	protein Wnt-5b
wnt8a	wnt family member 8A	LOC119730682	Wnt8	protein Wnt-8b-like isoform X1	Wnt8 protein
zfand6	AN1-type zinc finger protein 6	LOC119729722	LOC582526	AN1-type zinc finger protein 6-like	AN1-type zinc finger protein 6
zic1	Zic family member 1	LOC119724196	LOC578589	zinc finger protein ZIC 4-like	zinc finger protein ZIC 1
piwi	piwi like RNA-mediated gene silencing 3	N/A	LOC373434	#N/A	seawi isoform X1
				#N/A	#N/A
				#N/A	#N/A
				#N/A	#N/A
				#N/A	#N/A
				#N/A	#N/A
					#N/A
					#N/A
