# Supplementary material for: New hypotheses of cell type diversity and novelty from orthology-driven comparative single cell and nuclei transcriptomics in echinoderms
Source: eLife. 2023 Jul 20;12:e80090. doi: 10.7554/eLife.80090 (PMC10396339; doi:10.7554/eLife.80090)
Supplement: Supplementary file 3. — Contains the breakdown of cluster composition based on the original cell type analysis used in the single species atlases. [file elife-80090-supp3.xlsx]

## Sheet: Sheet1
Species' contribution to integrated clusters
Normalied specis contribution to Int CL
	raw counts		Normalized
	Pm	Sp	Normalized Pm	sp	toal number of cells	proportion from pm	proportion from sp	proportion total number of cells
0	2154	1639	1358.94	1639	2997.94	0.453292	0.546708	0.139733
1	1999	1204	1261.16	1204	2465.16	0.511593	0.488407	0.1149
2	1976	1028	1246.65	1028	2274.65	0.548062	0.451938	0.10602
3	1821	936	1148.86	936	2084.86	0.551048	0.448952	0.0971744
4	1929	738	1216.99	738	1954.99	0.622505	0.377495	0.0911215
5	1270	1246	801.235	1246	2047.23	0.391374	0.608626	0.0954208
6	1405	1009	886.406	1009	1895.41	0.46766	0.53234	0.0883441
7	1118	659	705.339	659	1364.34	0.516982	0.483018	0.0635913
8	940	595	593.04	595	1188.04	0.499175	0.500825	0.0553741
9	682	421	430.269	421	851.269	0.505444	0.494556	0.0396773
10	743	263	468.754	263	731.754	0.64059	0.35941	0.0341068
11	447	294	282.009	294	576.009	0.489592	0.510408	0.0268476
12	335	286	211.349	286	497.349	0.424952	0.575048	0.0231813
13	304	148	191.792	148	339.792	0.564439	0.435561	0.0158376
14	65	145	41.0081	145	186.008	0.220464	0.779536	0.00866977
total	16819	10611	10843.8	10611	21454.8
Cells Pm / Cells Sp =	1.58505
S. purpuratus
Raw counts of Spur CL # in each integrated cluster
	0 Ectoderm	1 Aboral Ectoderm	10 Neural	11 Aboral Ectoderm	12 Pigment cells A	13 Skeletogenic Mesenchyme	14 Pigment Cells B	15 Oral Ectoderm	16 Endoderm	17 Oral Non-skeletogenic Mesenchyme	18 Ciliary Band	19 Undetermined	2 Endomesoderm	20 Neural	21 Muscle	22 piwi3l+ Cells	3 Ectoderm	4 Ectoderm	5 Ectoderm	6 Endomeoderm	7 Aboral Ectoderm	8 Apical Ectoderm	9 Small Micromeres
0	17	821	6	17	0	5	2	3	0	0	30	0	140	0	0	0	72	176	29	6	267	39	9
1	116	38	25	6	5	12	3	112	1	0	3	2	100	0	5	0	111	123	327	9	15	168	23
2	33	45	66	4	1	2	4	3	0	0	9	0	521	1	0	0	51	83	64	12	52	70	7
3	154	8	2	0	17	13	3	6	72	1	n	0	17	1	6	2	55	7	13	422	49	8	80
4	267	79	19	1	11	13	1	3	5	0	5	0	70	6	0	0	108	47	34	11	16	34	8
5	791	16	5	3	24	24	1	0	14	0	8	10	19	0	0	21	239	24	10	6	7	13	11
6	295	45	119	47	6	6	0	8	3	0	11	1	67	0	4	0	199	73	49	11	16	47	2
7	64	28	14	4	22	121	20	2	13	6	1	2	36	7	18	1	33	22	9	37	5	14	180
8	100	102	7	8	95	4	65	1	7	1	0	2	46	7	6	0	42	20	20	8	16	17	21
9	17	11	69	140	0	0	0	9	1	0	20	0	14	2	4	0	28	33	34	2	14	23	0
10	57	26	7	3	3	7	3	2	1	0	2	9	31	1	4	0	24	21	19	6	14	14	9
11	98	17	10	4	9	8	5	0	2	0	1	2	21	0	3	0	42	36	13	2	8	9	4
12	15	1	1	1	32	4	101	2	0	93	0	0	6	0	10	0	3	3	2	0	0	2	10
13	33	7	2	0	7	8	2	0	0	0	0	0	14	51	1	0	14	1	3	1	0	2	2
14	42	0	0	0	1	1	0	0	1	0	1	60	0	0	0	35	2	0	1	0	0	0	1
proportion of total Spur CL ID in integrated cluster
IntCl	0 Ectoderm	1 Aboral Ectoderm	10 Neural	11 Aboral Ectoderm	12 Pigment cells A	13 Skeletogenic Mesenchyme	14 Pigment Cells B	15 Oral Ectoderm	16 Endoderm	17 Oral Non-skeletogenic Mesenchyme	18 Ciliary Band	19 Undetermined	2 Endomesoderm	20 Neural	21 Muscle	22 piwi3l+ Cells	3 Ectoderm	4 Ectoderm	5 Ectoderm	6 Endomeoderm	7 Aboral Ectoderm	8 Apical Ectoderm	9 Small Micromeres
0	0.008	0.66	0.017	0.071	0	0.022	0.01	0.02	0	0	0.33	0	0.127	0	0	0	0.07	0.263	0.046	0.011	0.557	0.085	0.025
1	0.055	0.031	0.071	0.025	0.021	0.053	0.014	0.742	0.008	0	0.033	0.023	0.091	0	0.082	0	0.109	0.184	0.522	0.017	0.031	0.365	0.063
2	0.016	0.036	0.188	0.017	0.004	0.009	0.019	0.02	0	0	0.099	0	0.473	0.013	0	0	0.05	0.124	0.102	0.023	0.109	0.152	0.019
3	0.073	0.006	0.006	0	0.073	0.057	0.014	0.04	0.6	0.01	0	0	0.015	0.013	0.098	0.034	0.054	0.01	0.021	0.792	0.102	0.017	0.218
4	0.127	0.064	0.054	0.004	0.047	0.057	0.005	0.02	0.042	0	0.055	0	0.064	0.079	0	0	0.106	0.07	0.054	0.021	0.033	0.074	0.022
5	0.377	0.013	0.014	0.013	0.103	0.105	0.005	0	0.117	0	0.088	0.114	0.017	0	0	0.356	0.234	0.036	0.016	0.011	0.015	0.028	0.03
6	0.141	0.036	0.338	0.197	0.026	0.026	0	0.053	0.025	0	0.121	0.011	0.061	0	0.066	0	0.195	0.109	0.078	0.021	0.033	0.102	0.005
7	0.03	0.023	0.04	0.017	0.094	0.531	0.095	0.013	0.108	0.059	0.011	0.023	0.033	0.092	0.295	0.017	0.032	0.033	0.014	0.069	0.01	0.03	0.49
8	0.048	0.082	0.02	0.034	0.408	0.018	0.31	0.007	0.058	0.01	0	0.023	0.042	0.092	0.098	0	0.041	0.03	0.032	0.015	0.033	0.037	0.057
9	0.008	0.009	0.196	0.588	0	0	0	0.06	0.008	0	0.22	0	0.013	0.026	0.066	0	0.027	0.049	0.054	0.004	0.029	0.05	0
10	0.027	0.021	0.02	0.013	0.013	0.031	0.014	0.013	0.008	0	0.022	0.102	0.028	0.013	0.066	0	0.023	0.031	0.03	0.011	0.029	0.03	0.025
11	0.047	0.014	0.028	0.017	0.039	0.035	0.024	0	0.017	0	0.011	0.023	0.019	0	0.049	0	0.041	0.054	0.021	0.004	0.017	0.02	0.011
12	0.007	0.001	0.003	0.004	0.137	0.018	0.481	0.013	0	0.921	0	0	0.005	0	0.164	0	0.003	0.004	0.003	0	0	0.004	0.027
13	0.016	0.006	0.006	0	0.03	0.035	0.01	0	0	0	0	0	0.013	0.671	0.016	0	0.014	0.001	0.005	0.002	0	0.004	0.005
14	0.02	0	0	0	0.004	0.004	0	0	0.008	0	0.011	0.682	0	0	0	0.593	0.002	0	0.002	0	0	0	0.003
P. miniata
Raw counts of Pmin CL # in each integrated cluster
Int CL	0 Mesoderm-like	1 Ectoderm	10 Early Neural	11 Veg1 Ectoderm/Endoderm	12 Undetermined	13 Endoderm	14 Right Coelom	15 Foregut	16 Left Coelom	17 Serotonergic Neural	18 Mixed Neural	19 Dividing Ectoderm	2 Ectoderm	20 Ciliary Band	21 Immune-like Mesenchyme	22 Sensory Neural	3 Veg1 Ectoderm/Endoderm	4 Post-oral Ciliary Band	5 Ventral Ectoderm	6 Muscle/Coelom	7 Oral Ectoderm	8 Veg1 Ectoderm	9 Oral Ectoderm
0	342	291	95	64	57	0	1	12	0	31	4	6	65	2	0	0	8	60	602	237	11	190	76
1	104	154	32	28	37	2	12	33	4	12	0	13	73	1	1	0	26	39	29	54	557	422	366
2	167	181	43	19	49	1	3	27	1	12	1	14	986	1	0	0	19	50	49	89	64	102	98
3	28	49	17	289	30	478	11	107	8	9	1	10	13	0	1	0	641	13	22	20	30	22	22
4	513	354	55	76	66	0	2	47	1	66	1	25	68	0	1	1	97	34	156	137	76	52	101
5	230	168	33	39	97	0	7	37	0	17	2	125	55	0	0	0	75	47	67	123	64	24	60
6	192	158	28	46	42	1	3	10	2	19	0	19	63	22	0	0	30	429	75	147	38	29	52
7	69	39	29	51	38	38	433	150	2	14	0	7	31	2	6	0	72	16	15	35	26	9	36
8	5	14	403	8	16	2	4	4	0	17	280	3	9	1	1	116	10	6	5	22	7	4	3
9	13	6	5	6	7	0	0	1	0	2	0	2	11	226	0	0	2	357	11	21	5	3	4
10	17	19	9	17	7	2	31	47	428	4	0	1	11	1	5	0	95	8	14	5	11	8	3
11	49	61	5	12	84	0	3	5	0	3	1	4	41	0	8	0	14	26	30	59	11	15	16
12	0	3	2	5	51	0	11	2	0	5	2	1	0	0	229	0	5	4	4	9	0	2	0
13	8	5	74	3	2	2	0	7	1	152	0	1	5	0	0	16	7	4	1	1	6	3	6
14	2	5	5	0	4	0	1	3	0	0	0	34	2	0	0	0	2	0	0	3	0	0	4
																			0
																			0
																			0
																			0
proportion of total Pmin CL ID in integrated cluster
Int CL	0 Mesoderm-like	1 Ectoderm	10 Early Neural	11 Veg1 Ectoderm/Endoderm	12 Undetermined	13 Endoderm	14 Right Coelom	15 Foregut	16 Left Coelom	17 Serotonergic Neural	18 Mixed Neural	19 Dividing Ectoderm	2 Ectoderm	20 Ciliary Band	21 Immune-like Mesenchyme	22 Sensory Neural	3 Veg1 Ectoderm/Endoderm	4 Post-oral Ciliary Band	5 Ventral Ectoderm	6 Muscle/Coelom	7 Oral Ectoderm	8 Veg1 Ectoderm	9 Oral Ectoderm
0	0.197	0.193	0.114	0.097	0.097	0	0.002	0.024	0	0.085	0.014	0.023	0.045	0.008	0	0	0.007	0.055	0.557	0.246	0.012	0.215	0.09
1	0.06	0.102	0.038	0.042	0.063	0.004	0.023	0.067	0.009	0.033	0	0.049	0.051	0.004	0.004	0	0.024	0.036	0.027	0.056	0.615	0.477	0.432
2	0.096	0.12	0.051	0.029	0.083	0.002	0.006	0.055	0.002	0.033	0.003	0.053	0.688	0.004	0	0	0.017	0.046	0.045	0.093	0.071	0.115	0.116
3	0.016	0.033	0.02	0.436	0.051	0.909	0.021	0.217	0.018	0.025	0.003	0.038	0.009	0	0.004	0	0.581	0.012	0.02	0.021	0.033	0.025	0.026
4	0.295	0.235	0.066	0.115	0.112	0	0.004	0.096	0.002	0.182	0.003	0.094	0.047	0	0.004	0.008	0.088	0.031	0.144	0.142	0.084	0.059	0.119
5	0.132	0.111	0.04	0.059	0.165	0	0.013	0.075	0	0.047	0.007	0.472	0.038	0	0	0	0.068	0.043	0.062	0.128	0.071	0.027	0.071
6	0.11	0.105	0.034	0.069	0.072	0.002	0.006	0.02	0.004	0.052	0	0.072	0.044	0.086	0	0	0.027	0.392	0.069	0.153	0.042	0.033	0.061
7	0.04	0.026	0.035	0.077	0.065	0.072	0.83	0.305	0.004	0.039	0	0.026	0.022	0.008	0.024	0	0.065	0.015	0.014	0.036	0.029	0.01	0.043
8	0.003	0.009	0.483	0.012	0.027	0.004	0.008	0.008	0	0.047	0.959	0.011	0.006	0.004	0.004	0.872	0.009	0.005	0.005	0.023	0.008	0.005	0.004
9	0.007	0.004	0.006	0.009	0.012	0	0	0.002	0	0.006	0	0.008	0.008	0.883	0	0	0.002	0.327	0.01	0.022	0.006	0.003	0.005
10	0.01	0.013	0.011	0.026	0.012	0.004	0.059	0.096	0.957	0.011	0	0.004	0.008	0.004	0.02	0	0.086	0.007	0.013	0.005	0.012	0.009	0.004
11	0.028	0.04	0.006	0.018	0.143	0	0.006	0.01	0	0.008	0.003	0.015	0.029	0	0.032	0	0.013	0.024	0.028	0.061	0.012	0.017	0.019
12	0	0.002	0.002	0.008	0.087	0	0.021	0.004	0	0.014	0.007	0.004	0	0	0.909	0	0.005	0.004	0.004	0.009	0	0.002	0
13	0.005	0.003	0.089	0.005	0.003	0.004	0	0.014	0.002	0.419	0	0.004	0.003	0	0	0.12	0.006	0.004	0.001	0.001	0.007	0.003	0.007
14	0.001	0.003	0.006	0	0.007	0	0.002	0.006	0	0	0	0.128	0.001	0	0	0	0.002	0	0	0.003	0	0	0.005
