# Supplementary material for: New hypotheses of cell type diversity and novelty from orthology-driven comparative single cell and nuclei transcriptomics in echinoderms
Source: eLife. 2023 Jul 20;12:e80090. doi: 10.7554/eLife.80090 (PMC10396339; doi:10.7554/eLife.80090)
Supplement: Supplementary file 4. [file elife-80090-supp4.xlsx]

## Sheet: Sheet1
P miniata gene
tek	F1	TCGAGTTTCCTGGAGTGCAT
	R2	CGTCTGCTCCCGAAATTCAG
VEGFR1L	F1	CCCTCTACTACACGGAGCAG
	R2	GTCGGTTGCAGTTCTTTGGT
	F3	GGCAACCTGAGTGACTACCT
	R4	TCACTCCAACACTCCAGCAT
	F5	AAATACACGTGCACCATCGG
	R6	GAATCGTTTCTTCGGGGCTC
gata3	F5	TTATACCACGTACGTCCCGG
	R6	TGACATGGGCAGACTACAGG
elavl1-b	F1	CAA CAA CCC AAG TCA GAA CT
	R2	CAA AAT AAT AAC CGG GCT AA
tfap2a	F1	CCG TAT TGG TGG CTG TGC TGC A
	R2	CGG CTG CAT GGT CCT GAT GGT G
Msxlx	F1	TCACATGGACGCAGACCTTA
	R2	CACGTCAATGCTGCTGAGAT
thrb	F1	CTGAGATCATGACGCCCTCT
	R2	TCCCATACATGCAACCCAGT
nr6a1b	F1	CAATTTGATCCCACCGTCCC
	R2	CTCCGCCGCTGTTACTACTA
Pax5L	F1	TCCATCAACGGTATCCTCGG
	R2	TGAGGGTGGTTGTACTGCAT
hoxD9a	F1	gattttagctcagccaccgg
	R2	tgaacaagcccgtctcagat
Etv1	F1	aatgccacgacaaactggac
	R2	tgacctggaagccactgtag
Got1	F1	gacatagacgggatgctgga
	R2	ccttggcaatgtagtccacg
Syt7	F1	tctcccaccttcacacagtc
	R2	atgatccctccgatggtgtc
Syt14	F1	gactccgcatcctcctctac
	R2	gtctcctcgtcgctactgtt
Rab3	F1	gttgacaacagatcgtggca
	R2	gcaggacgtattggagggg
Sp6 sequence	gaaatATTTAGGTGACACTATAGAAG
